# Supplementary material for: Microflow injection system based on a multicommutation technique for nitrite determination in wastewaters
Source: Royal Society of Chemistry journal article supplement (doi:10.1039/b605043c), 2006-01-01
Supplement: b605043c.pdf [file b605043c.pdf]

## CRM results

| <b>Sample</b> | <b>Microflow injection system</b> | <b>Capillary electrophoresis</b> |
|---------------|-----------------------------------|----------------------------------|
| S1            | 1626±72                           | 1610±42                          |
| S2            | 1545±5                            | 1536±33                          |
| S3            | 1357±13                           | 1315±20                          |
| S4            | 1249±51                           | 1232±16                          |
| S5            | 950±27                            | 975±23                           |
| S6            | 664±14                            | 652±20                           |
| S7            | 363±15                            | 346±15                           |
| S8            | 199±3                             | 197±2                            |
| S9            | 3.54±0.16                         | 3.3±0.3                          |
